# Supplementary material
Source: PubMed Central journal article supplement (PMC3545482)
Supplement: NIHMS422644-supplement-Supplementary_Figure_1.pdf [file NIHMS422644-supplement-Supplementary_Figure_1.pdf]

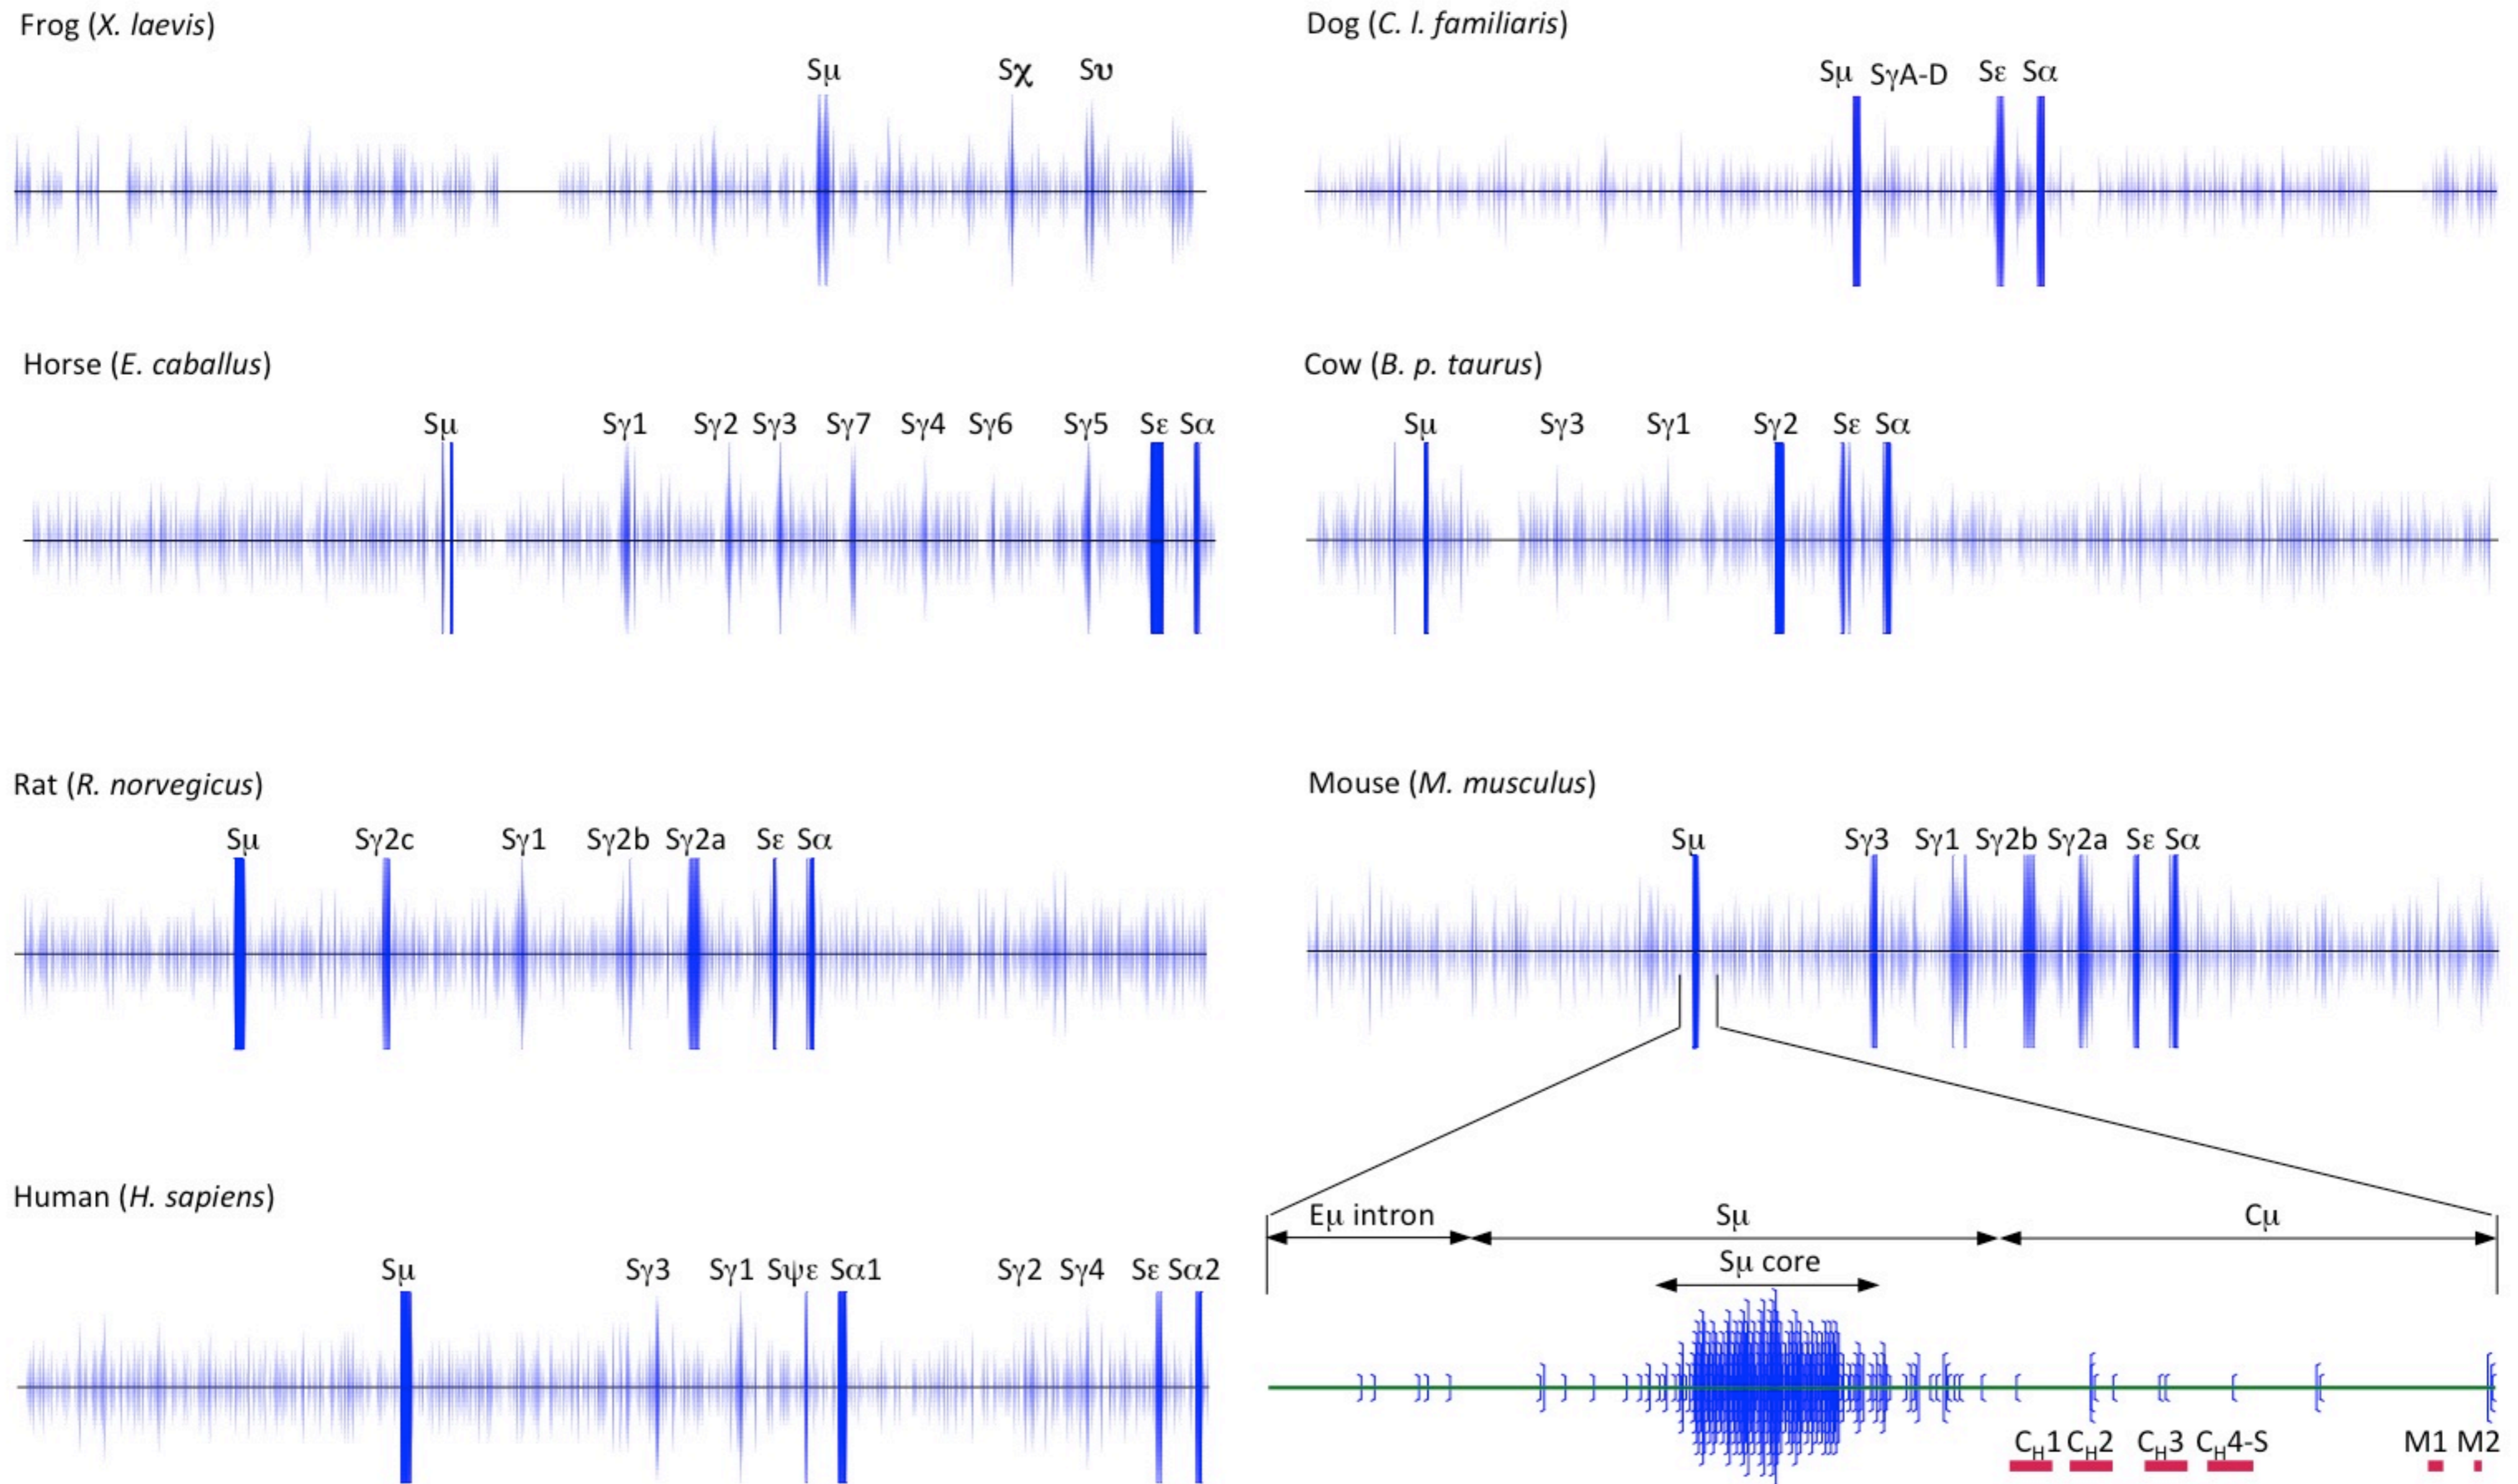

Supplementary Figure 1 | **5'-AGCT-3' repeats in S region DNA.** 5'-AGCT-3' is an evolutionarily conserved motif recurring at a high frequency in S regions of the IgH locus in species that support CSR, from *X. laevis* to human (each vertical line represents a 5'-AGCT-3' motif in 400-kb DNA that includes all  $D_H$  and  $J_H$  gene segments, S and  $C_H$  regions – lines are stacked when multiple 5'-AGCT-3' motifs are closely spaced). 5'-AGCT-3' accounts for 45% of the  $S_\mu$  core DNA (shown in the magnified map of the mouse *IgH* DNA from the end of the  $J_H4$  gene segment to  $C_\mu$  region, including the  $E_\mu$  intron,  $S_\mu$  and the  $C_{H1}$ ,  $C_{H2}$ ,  $C_{H3}$ ,  $C_{H4-S}$ , M1 and M2 exons of  $C_\mu$ ), while less than 2% of DNA in  $C_H$  regions and the genome at large. 5'-AGCT-3' is an iteration of the CSR and SHM hotspot 5'-RGYW-3', within which DSBs, S-S junctions and point-mutations preferentially segregate. 5'-AGCT-3' is also an iteration of 5'-WGCW-3', which includes 5'-WGC-3', the preferred substrate for AID dC DNA deamination activity, in both DNA strands. Due to their palindromic nature, 5'-AGCT-3' repeats can form complex secondary DNA structures, including cruciform structures.
